# Supplementary material
Source: MDPI journal article supplement (https://www.mdpi.com/2673-3501/3/4/14)

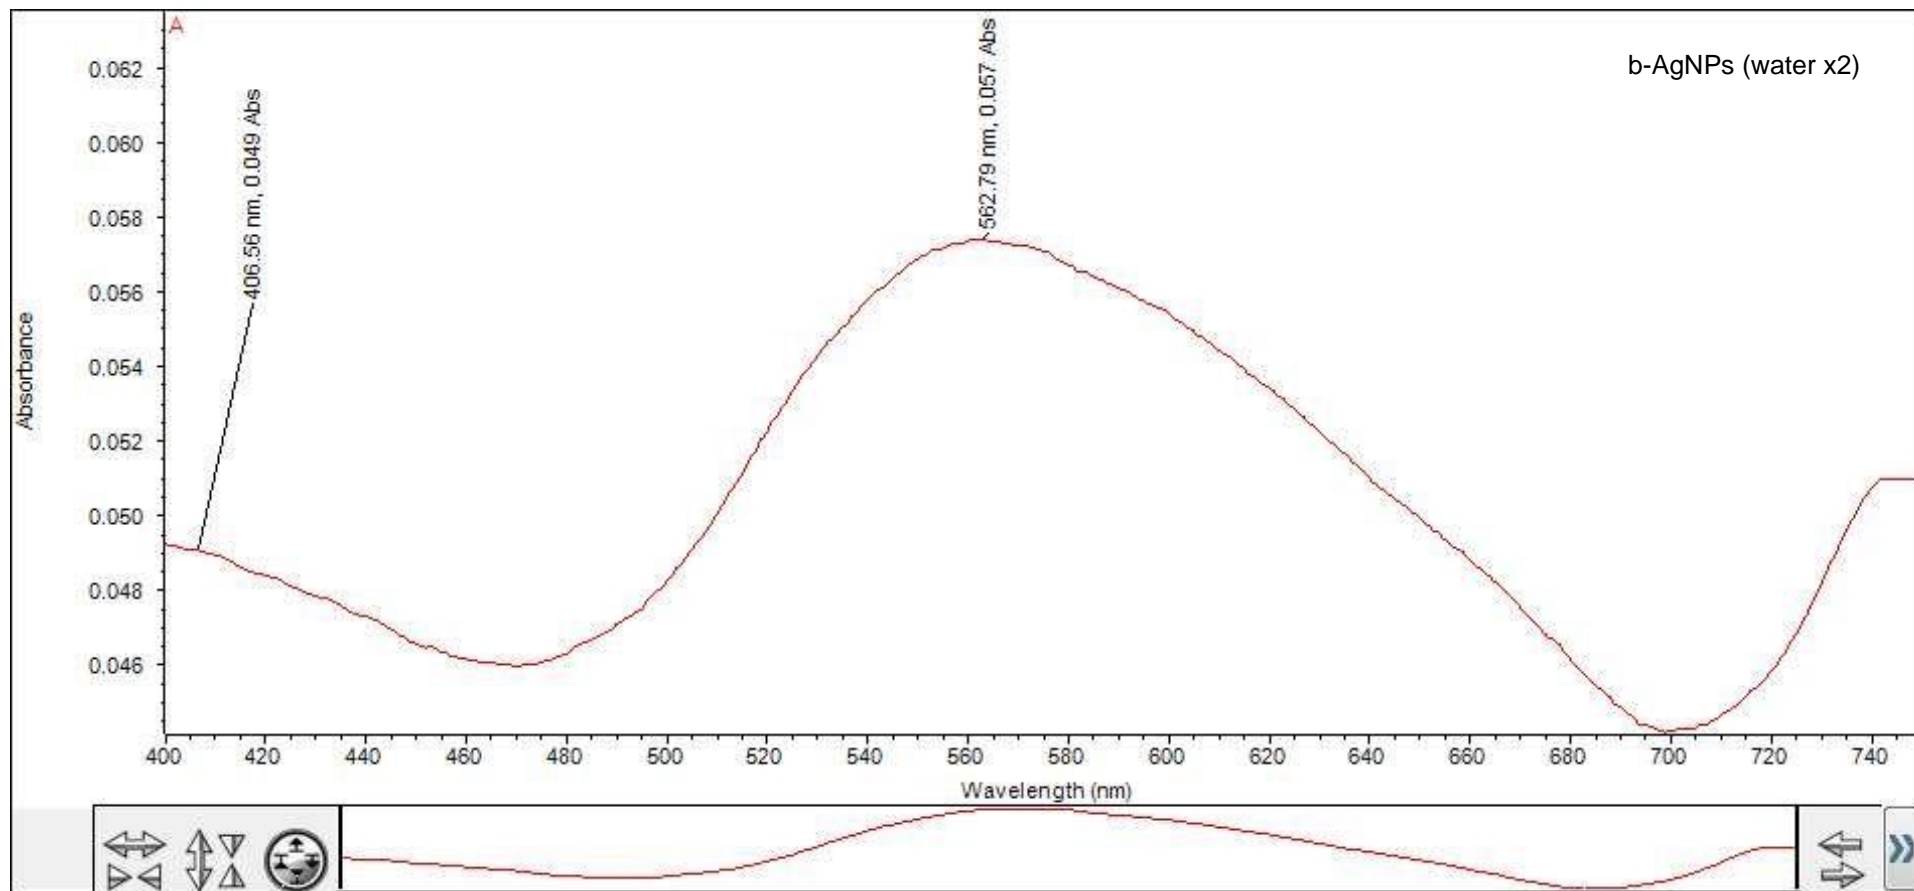

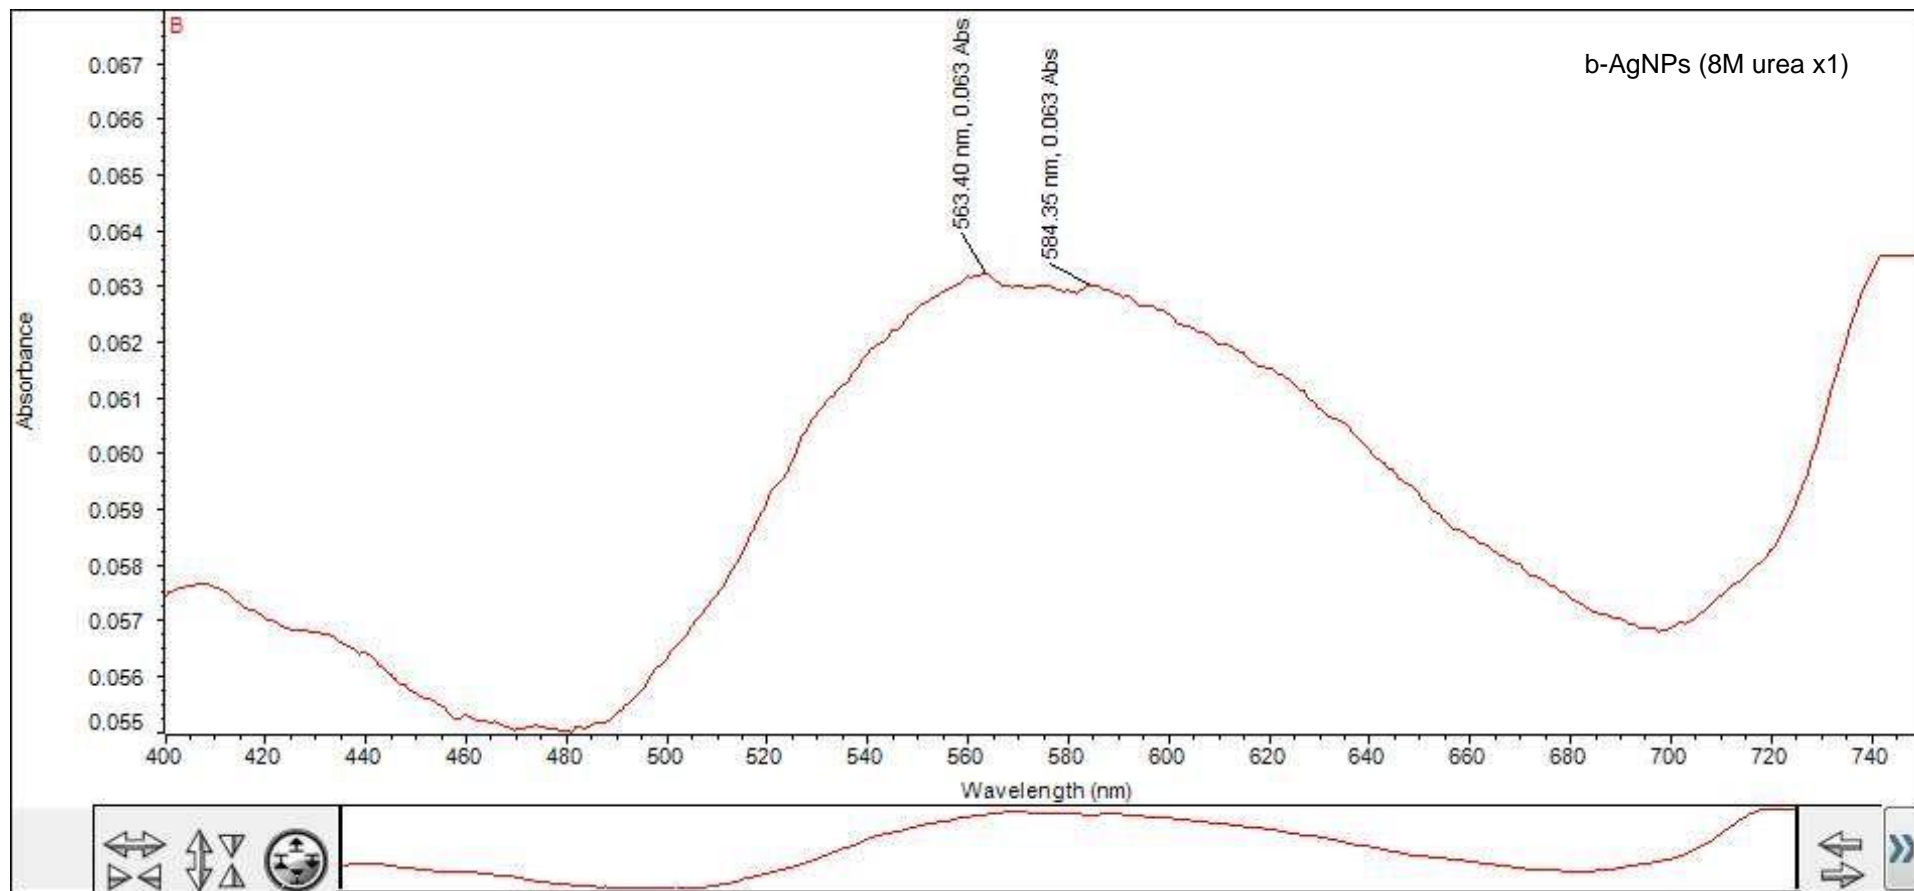

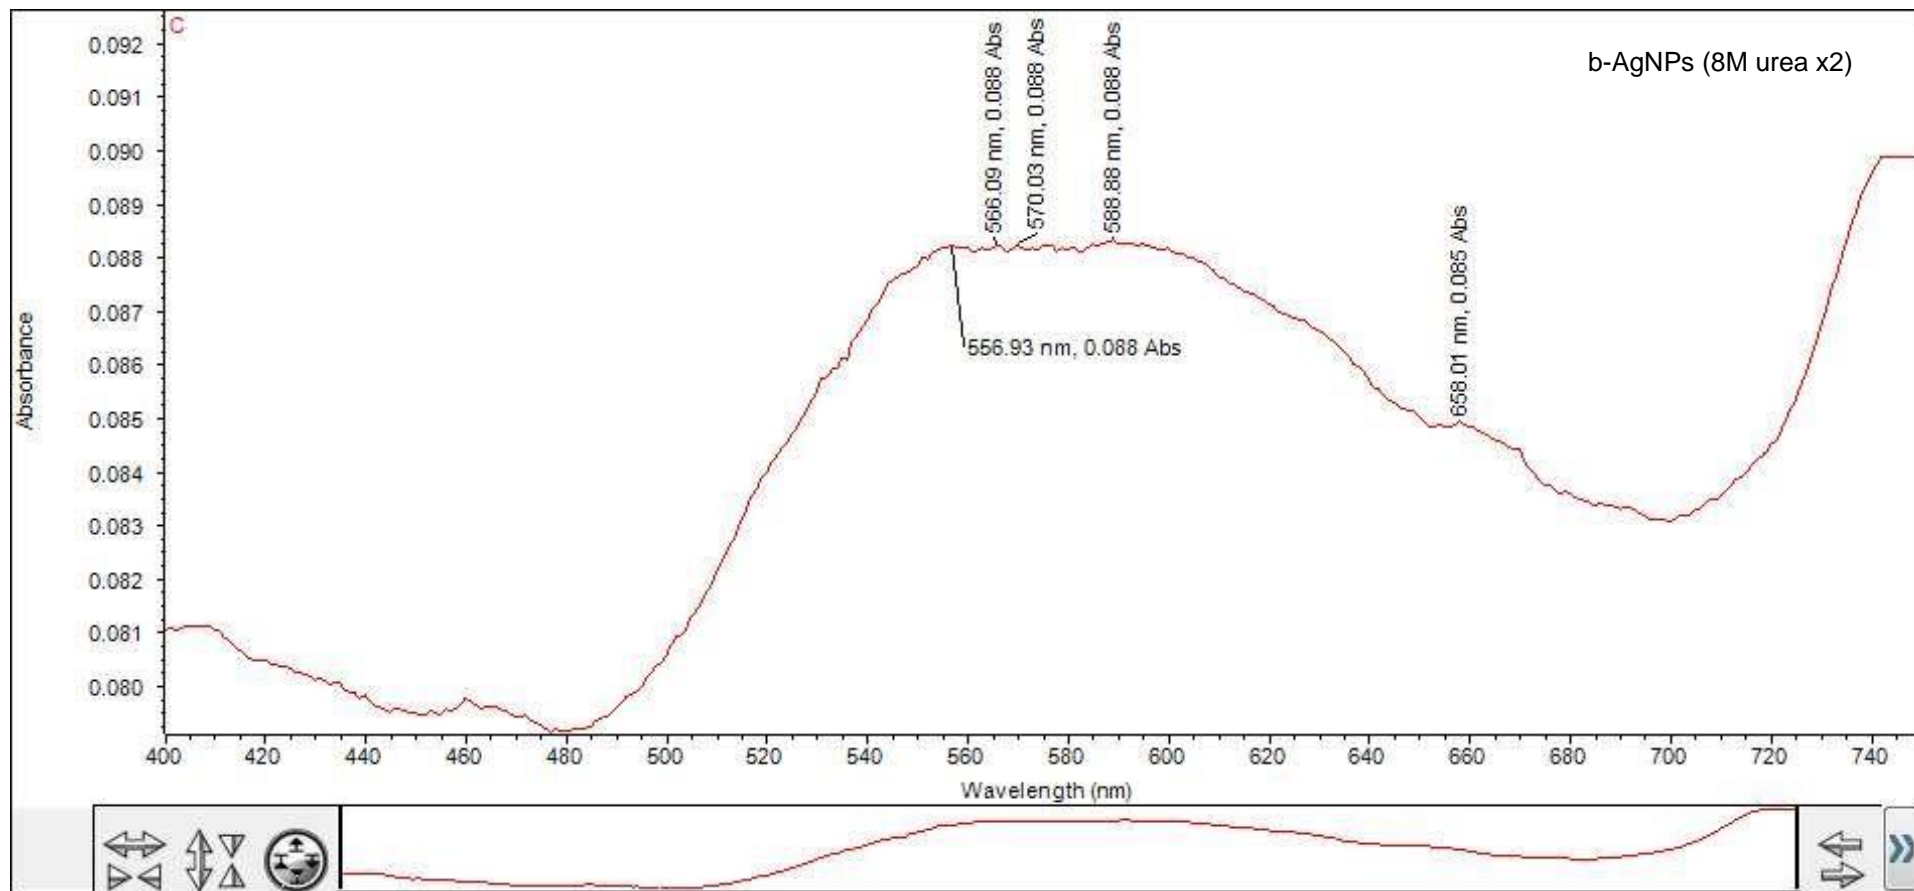

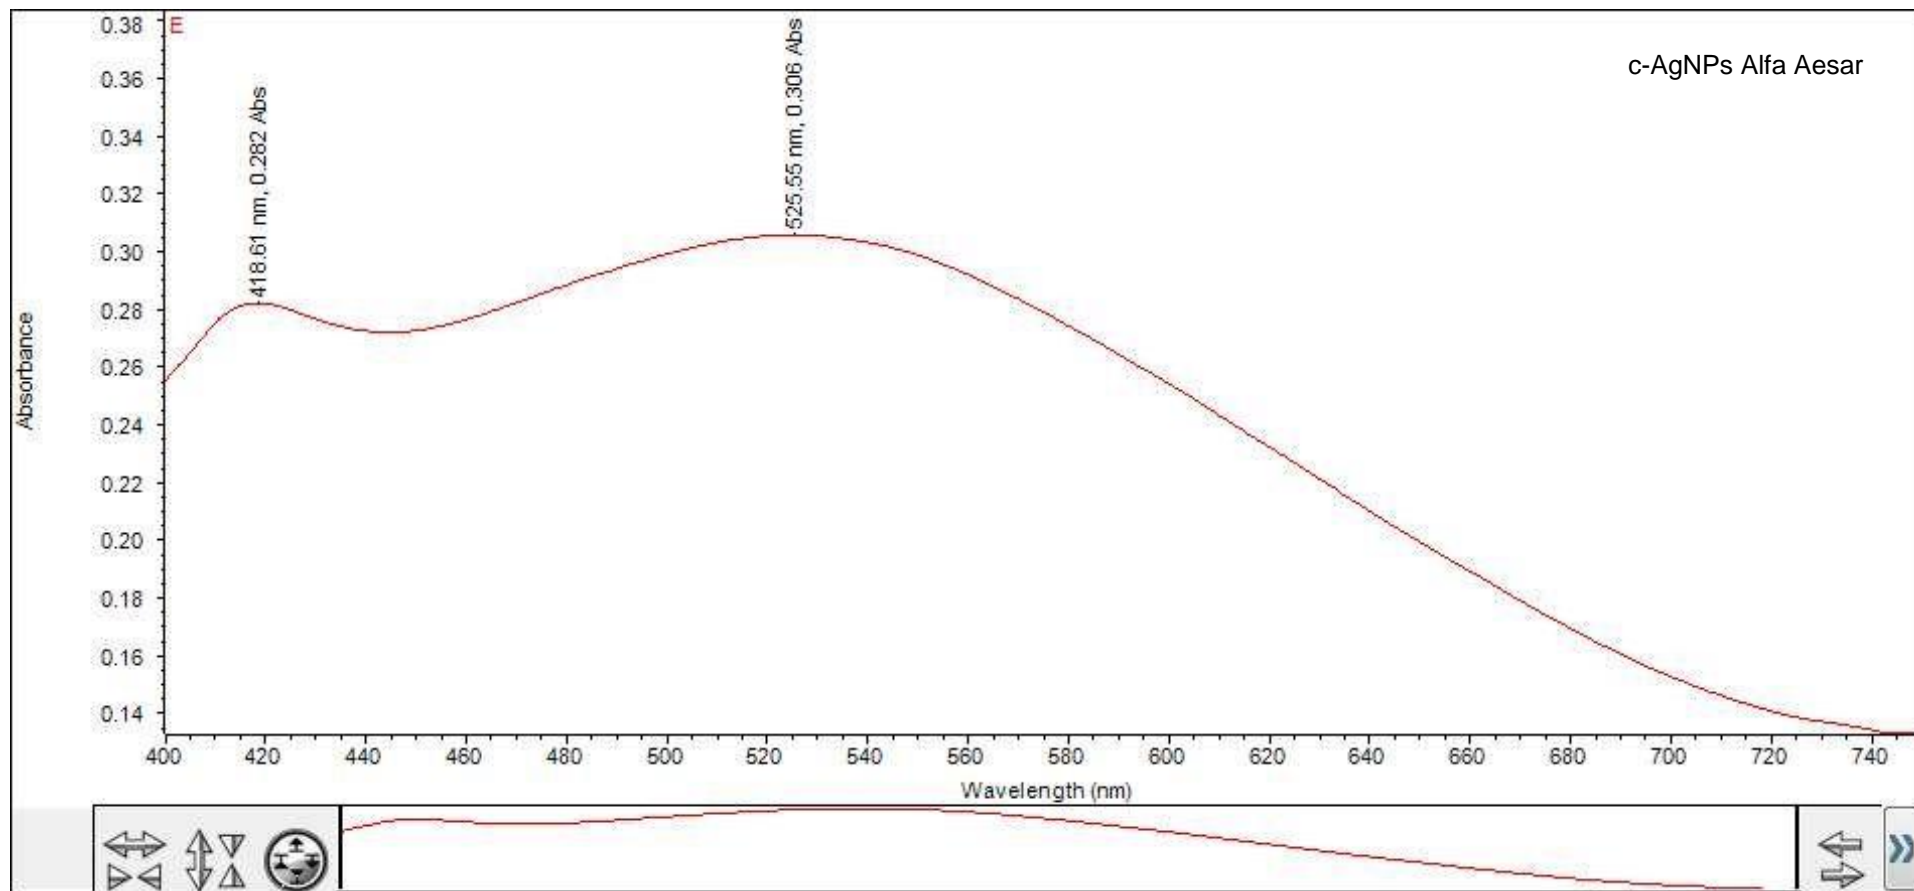

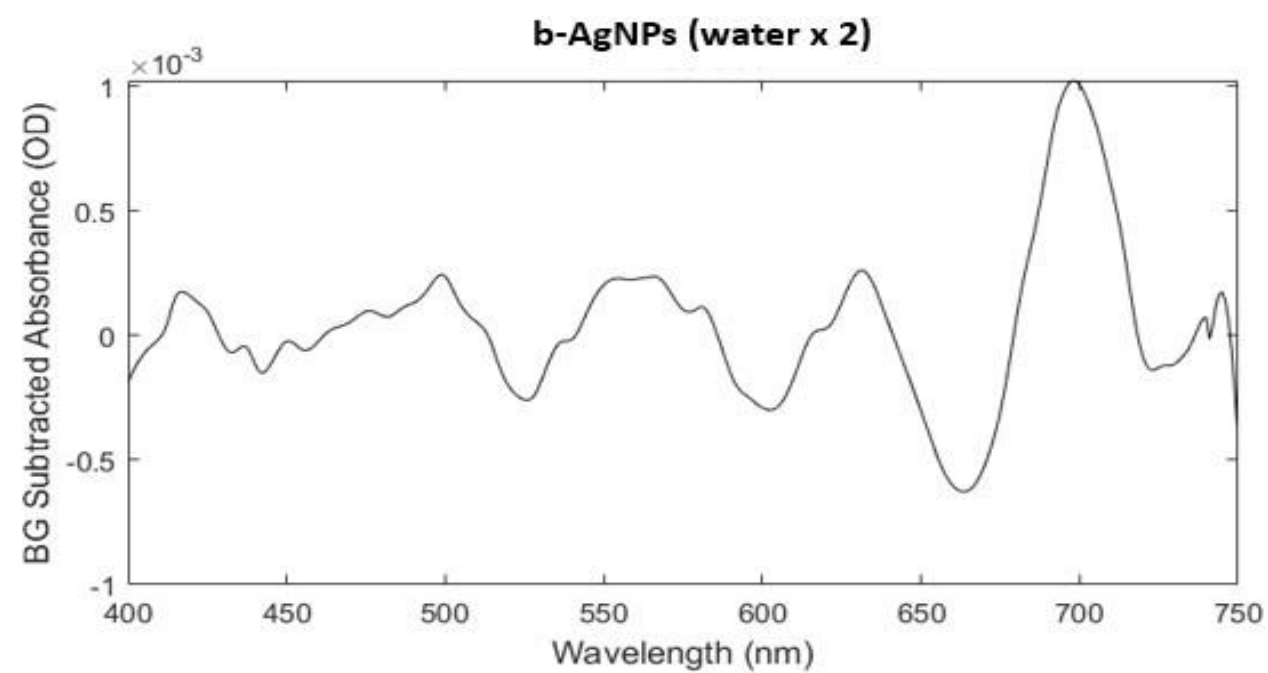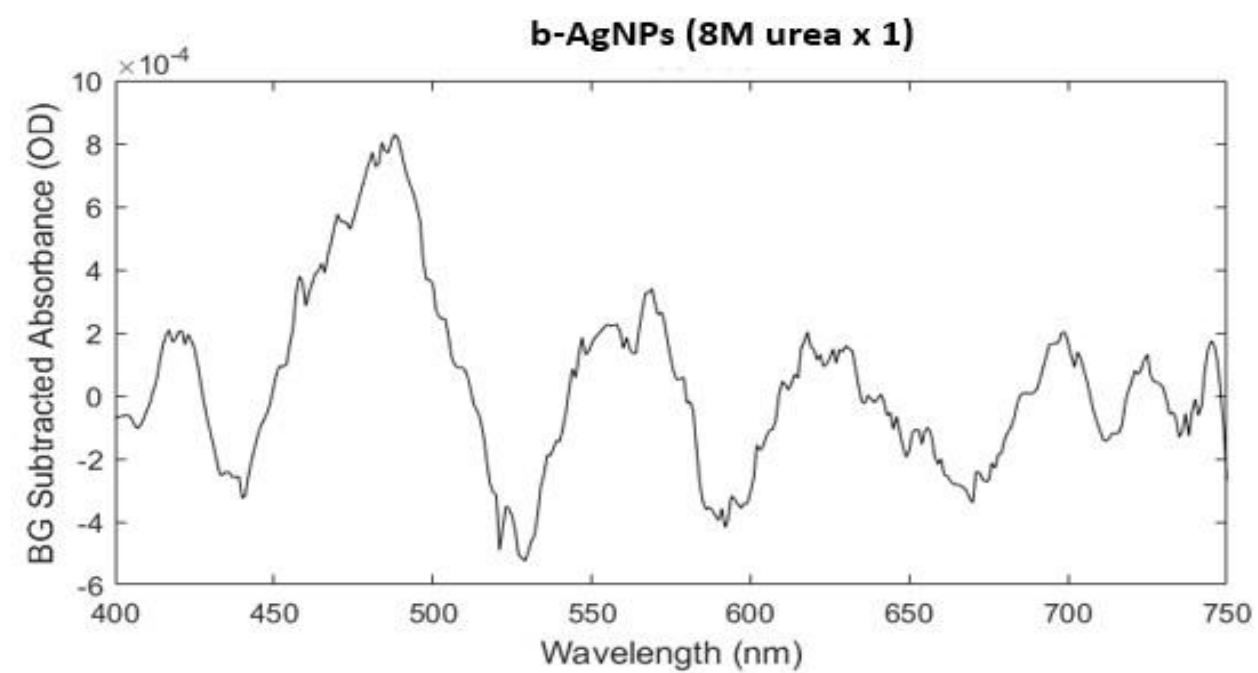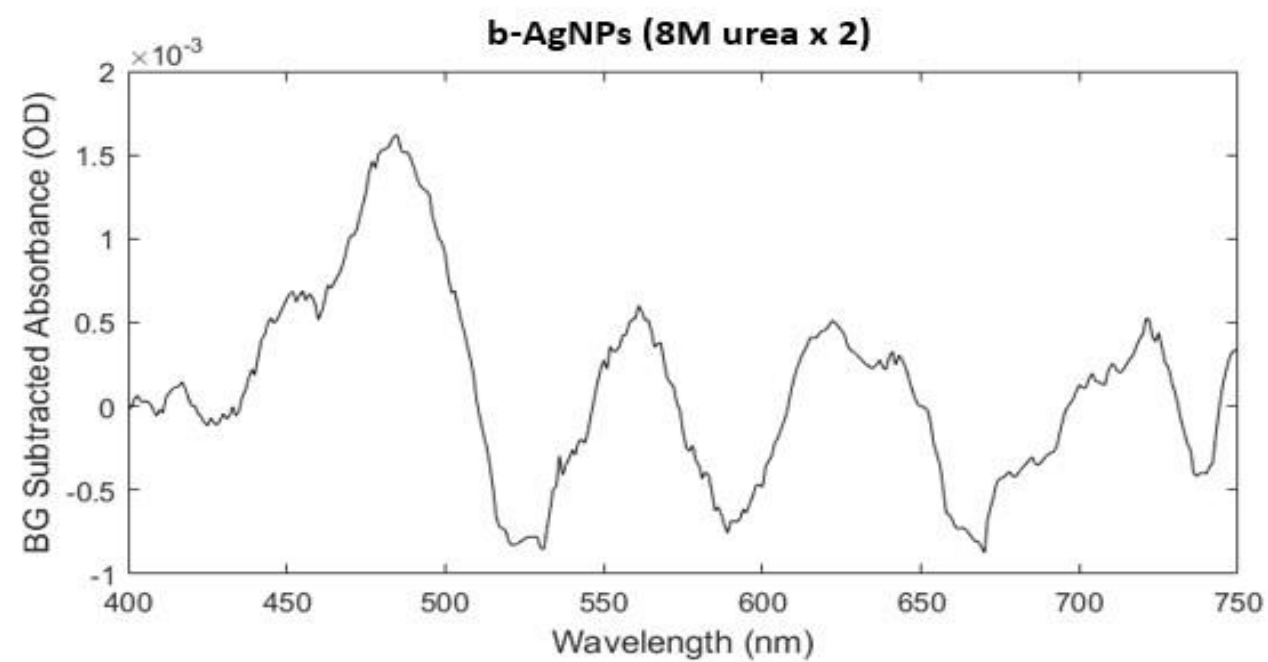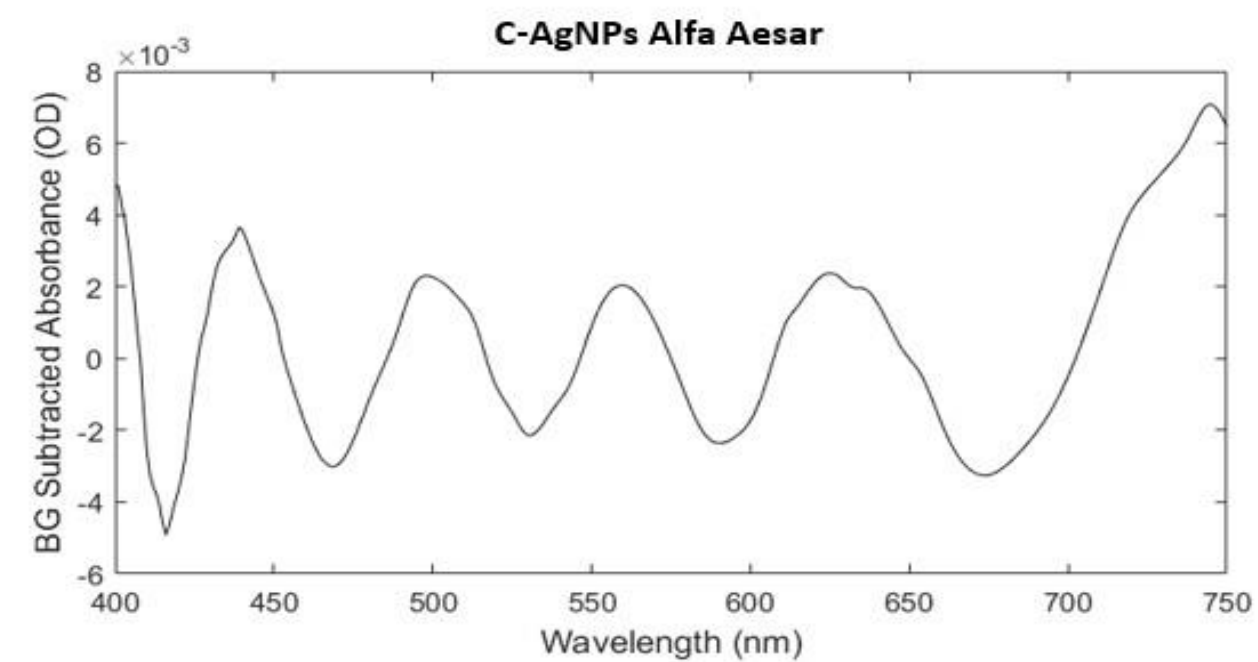

**Figure S1.** The individual spectra and Voight residual fit.

Supplement: s1 [file s1]
